# Supplementary material for: Correlation Analysis of Microbiota and Volatile Flavor Compounds of Caishiji Soybean Paste
Source: MDPI journal article supplement (doi:10.3390/fermentation8050196), 2022-04-27
Supplement: s1 [file s1]

## **Correlation analysis of microbiota and volatile flavor compounds of Caishiji soybean paste**

### **Supplementary Material:**

#### **Figures**

**Figure S1** Multi-point sampling (a) and numbers of different VFCs (b) of Caishiji soybean paste in different fermentation stages.

**Figure S2** Contents of main volatile components of Caishiji soybean paste in different fermentation stages (a: alcohols, b: esters, c: aldehydes, d: miscellaneous).

**Figure S3** Simpson curves of the bacteria (a) and fungi (b) of Caishiji soybean paste in different fermentation stages.

#### **Table**

**Table S1** Alpha diversity index of bacteria of Caishiji soybean paste in different fermentation stages

**Table S2** Alpha diversity index of fungi of Caishiji soybean paste in different fermentation stages

Figure S1

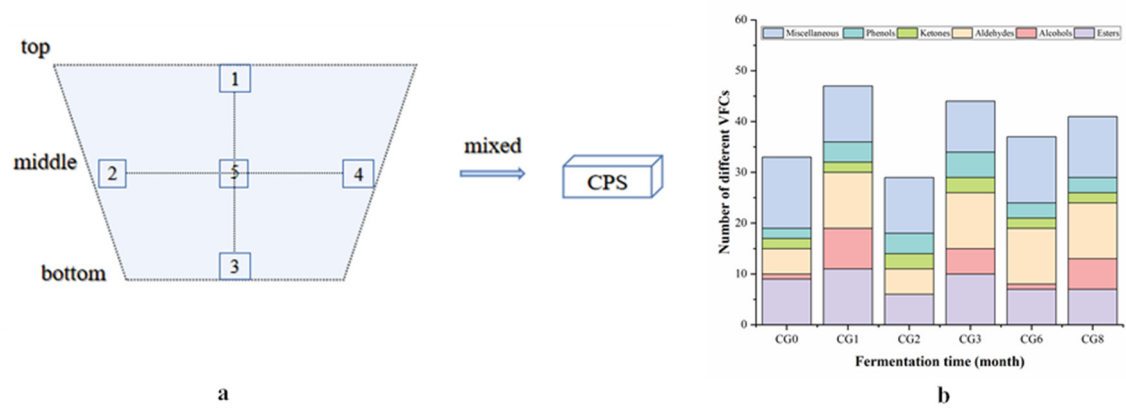

**Figure S2**

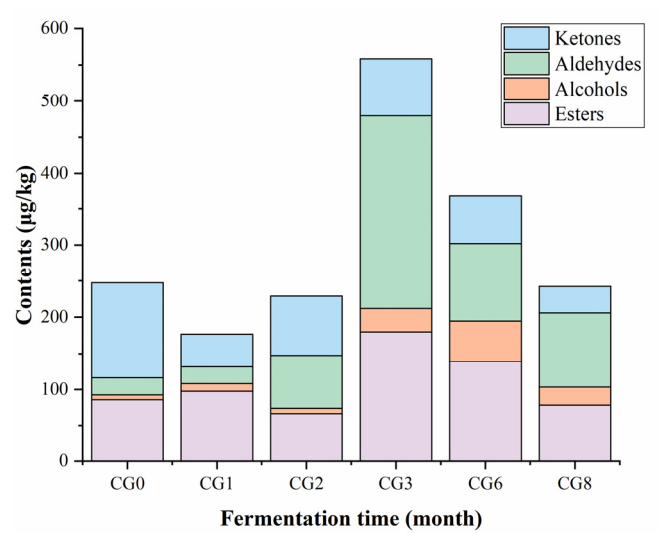

Figure S3

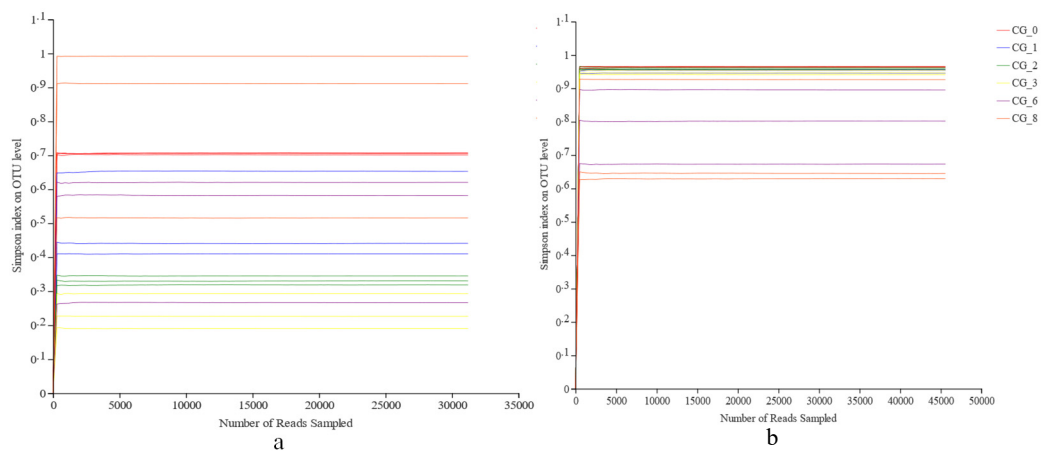

## Table

**Table S1**

| 0.97   |     |                          |                          |                            |                            |          |
|--------|-----|--------------------------|--------------------------|----------------------------|----------------------------|----------|
| Sample | OTU | Shannon                  | Simpson                  | Ace                        | Chao                       | coverage |
| CG0    | 47  | 0.84±0.009 <sup>cd</sup> | 0.70±0.003 <sup>ab</sup> | 144.94±38.647 <sup>b</sup> | 111.96±13.080 <sup>b</sup> | 0.99     |
| CG1    | 74  | 1.07±0.233 <sup>bc</sup> | 0.50±0.132 <sup>bc</sup> | 131.35±43.105 <sup>b</sup> | 76.02±19.558 <sup>c</sup>  | 0.99     |
| CG2    | 80  | 1.64±0.016 <sup>b</sup>  | 0.33±0.013 <sup>c</sup>  | 117.98±33.338 <sup>b</sup> | 108.20±26.280 <sup>b</sup> | 0.99     |
| CG3    | 198 | 2.24±0.145 <sup>a</sup>  | 0.24±0.052 <sup>c</sup>  | 276.06±33.021 <sup>a</sup> | 248.72±12.591 <sup>a</sup> | 0.99     |
| CG6    | 187 | 1.39±0.500 <sup>bc</sup> | 0.49±0.194 <sup>bc</sup> | 241.79±3.873 <sup>a</sup>  | 225.35±4.476 <sup>a</sup>  | 0.99     |
| CG8    | 32  | 0.47±0.548 <sup>d</sup>  | 0.81±0.255 <sup>a</sup>  | 49.70±25.031 <sup>c</sup>  | 38.34±16.377 <sup>c</sup>  | 0.99     |

† Values represent means ± SD. Means with different superscript letters are significantly different horizontally (one-way analysis of variance; P<0.05).

**Table S2**

| 0.97   |     |                         |                         |                           |                                       |          |
|--------|-----|-------------------------|-------------------------|---------------------------|---------------------------------------|----------|
| Sample | OTU | Shannon                 | Simpson                 | Ace                       | Chao                                  | coverage |
| CG0    | 5   | 0.09±0.003 <sup>b</sup> | 0.96±0.002 <sup>a</sup> | 5.59±2.504 <sup>c</sup>   | 4.17±1.258 <sup>d</sup>               | 0.99     |
| CG1    | 17  | 0.12±0.012 <sup>b</sup> | 0.95±0.006 <sup>a</sup> | 30.24±11.588 <sup>b</sup> | 24.53±6.562 <sup>b</sup> <sup>c</sup> | 0.99     |
| CG2    | 8   | 0.10±0.005 <sup>b</sup> | 0.96±0.003 <sup>a</sup> | 10.31±10.325 <sup>c</sup> | 5.67±3.055 <sup>cd</sup>              | 0.99     |
| CG3    | 38  | 0.15±0.021 <sup>b</sup> | 0.95±0.007 <sup>a</sup> | 70.87±6.243 <sup>a</sup>  | 59.28±8.979 <sup>a</sup>              | 0.99     |
| CG6    | 67  | 0.60±0.240 <sup>a</sup> | 0.79±0.112 <sup>b</sup> | 79.39±19.113 <sup>a</sup> | 76.53±22.931 <sup>a</sup>             | 0.99     |
| CG8    | 32  | 0.77±0.480 <sup>a</sup> | 0.73±0.167 <sup>b</sup> | 29.43±5.273 <sup>b</sup>  | 29.17±5.008 <sup>b</sup>              | 0.99     |

† Values represent means ± SD. Means with different superscript letters are significantly different horizontally (one-way analysis of variance; P<0.05).
